# Supplementary material for: Architecture of the U6 snRNP reveals specific recognition of 3′-end processed U6 snRNA
Source: PubMed Central journal article supplement (PMC5931518; doi:10.1038/s41467-018-04145-4), 2018-05-01
Supplement: 41467_2018_4145_MOESM3_ESM.pdf [file 41467_2018_4145_MOESM3_ESM.pdf]

### **Description of Additional Supplementary Files:**

Supplementary Movie 1: **Structure of the U6 snRNP**. This video shows a 360 degree rotation of the U6 snRNP (PDB coordinate file: 5VSU). Colors are as in Figure 1.

Supplementary Dataset 1: Pymol session file of the overlaid U6 snRNP structures (PDB coordinate files: 6ASO and 5VSU). Colors are as in Figure 1.
